# Supplementary material
Source: publisher figshare collection journal article supplement (https://gsajournals.figshare.com/ndownloader/files/23994302)
Supplement: Supplementary file 1 [file 23994302]

|  |  | | |  | |  | |  |  |  |
| --- | --- | --- | --- | --- | --- | --- | --- | --- | --- | --- |
| File S4. ANOVA tables for color phenotypes |  | |  | |
|  | |  | |  | | |  |  |  |
| DFA |  | | |  | |  | |  |  |  |
|  |  | | |  | |  | |  |  |  |
|  |  | | | Df | | Sum Sq | | Mean Sq | F value | Pr(>F) |
|  | :----------- | | | ----: | | --------: | | -------: | -------: | ------: |
|  | Family | | | 29 | | 410.879 | | 14.168 | 45.592 | 0 |
|  | Year | | | 1 | | 15.767 | | 15.767 | 50.736 | 0 |
|  | Age | | | 1 | | 0.195 | | 0.195 | 0.627 | 0.429 |
|  | Individual | | | 438 | | 1325.561 | | 3.026 | 9.739 | 0 |
|  | Family:Year | | | 27 | | 61.08 | | 2.262 | 7.28 | 0 |
|  | Residuals | | | 6609 | | 2053.845 | | 0.311 | NA | NA |
|  |  | | |  | |  | |  |  |  |
| L* |  | | |  | |  | |  |  |  |
|  |  | | |  | |  | |  |  |  |
|  |  | | | Df | | Sum Sq | | Mean Sq | F value | Pr(>F) |
|  | :----------- | | | ----: | | ----------: | | --------: | -------: | ------: |
|  | Family | | | 32 | | 35123.18 | | 1097.599 | 49.02 | 0 |
|  | Year | | | 1 | | 276.807 | | 276.807 | 12.363 | 0 |
|  | Age | | | 1 | | 18.402 | | 18.402 | 0.822 | 0.365 |
|  | Individual | | | 473 | | 83489.608 | | 176.511 | 7.883 | 0 |
|  | Family:Year | | | 26 | | 6153.351 | | 236.667 | 10.57 | 0 |
|  | Residuals | | | 8752 | | 195963.459 | | 22.391 | NA | NA |
|  |  | | |  | |  | |  |  |  |
| a* |  | | |  | |  | |  |  |  |
|  |  | | |  | |  | |  |  |  |
|  |  | | | Df | | Sum Sq | | Mean Sq | F value | Pr(>F) |
|  | :----------- | | | ----: | | ---------: | | -------: | -------: | ------: |
|  | Family | | | 32 | | 5586.956 | | 174.592 | 100.466 | 0 |
|  | Year | | | 1 | | 837.888 | | 837.888 | 482.145 | 0 |
|  | Age | | | 1 | | 6.881 | | 6.881 | 3.96 | 0.047 |
|  | Individual | | | 473 | | 10104.182 | | 21.362 | 12.292 | 0 |
|  | Family:Year | | | 26 | | 1265.738 | | 48.682 | 28.013 | 0 |
|  | Residuals | | | 8752 | | 15209.516 | | 1.738 | NA | NA |
|  |  | | |  | |  | |  |  |  |
| b* |  | | |  | |  | |  |  |  |
|  |  | | |  | |  | |  |  |  |
|  |  | | | Df | | Sum Sq | | Mean Sq | F value | Pr(>F) |
|  | :----------- | | | ----: | | ---------: | | --------: | -------: | ------: |
|  | Family | | | 32 | | 9881.603 | | 308.8 | 48.163 | 0 |
|  | Year | | | 1 | | 2637.207 | | 2637.207 | 411.319 | 0 |
|  | Age | | | 1 | | 65.408 | | 65.408 | 10.201 | 0.001 |
|  | Individual | | | 473 | | 20033.798 | | 42.355 | 6.606 | 0 |
|  | Family:Year | | | 26 | | 2470.712 | | 95.027 | 14.821 | 0 |
|  | Residuals | | | 8752 | | 56114.198 | | 6.412 | NA | NA |
|  |  | | |  | |  | |  |  |  |
